# Supplementary material
Source: MDPI journal article supplement (https://www.mdpi.com/2073-4344/12/7/797)
Supplement: s1 [file s1]

## Supplementary data

# Ordered Mesoporous nZVI/Zr-Ce-SBA-15 Catalysts Used for Nitrate Reduction: Synthesis, Optimization and Mechanism

Ruimin Zhang <sup>1,\*</sup>, Haixia Liu <sup>1</sup>, Weili Jiang <sup>2</sup>, Weijing Liu <sup>2</sup>

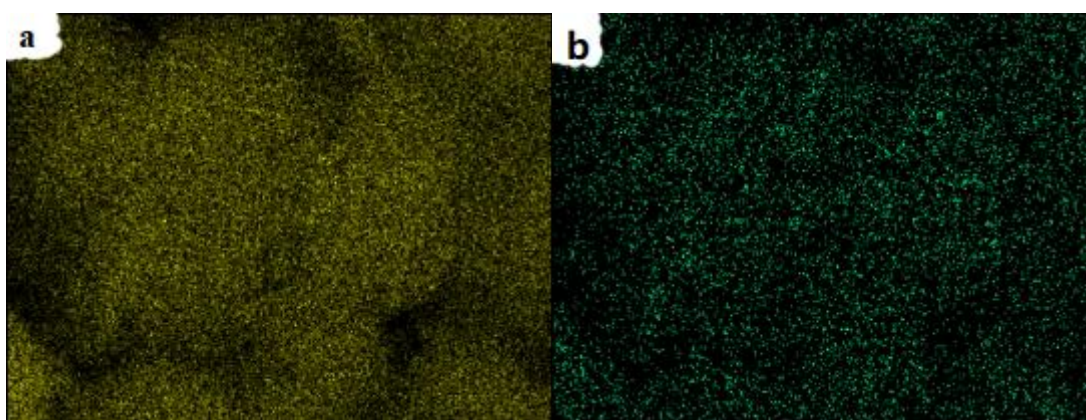

**Figure S1.** SEM characterization of Si (a) and Zr (b) distribution of nZVI/Zr-Ce-SBA-15 composites.

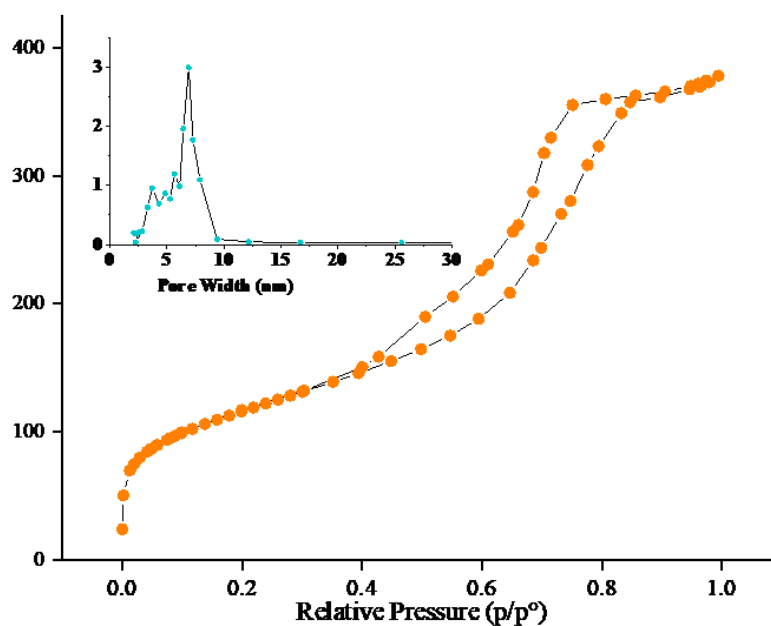

**Figure S2.** Characterization of N<sub>2</sub> adsorption for nZVI/Zr-Ce-SBA-15 composites.

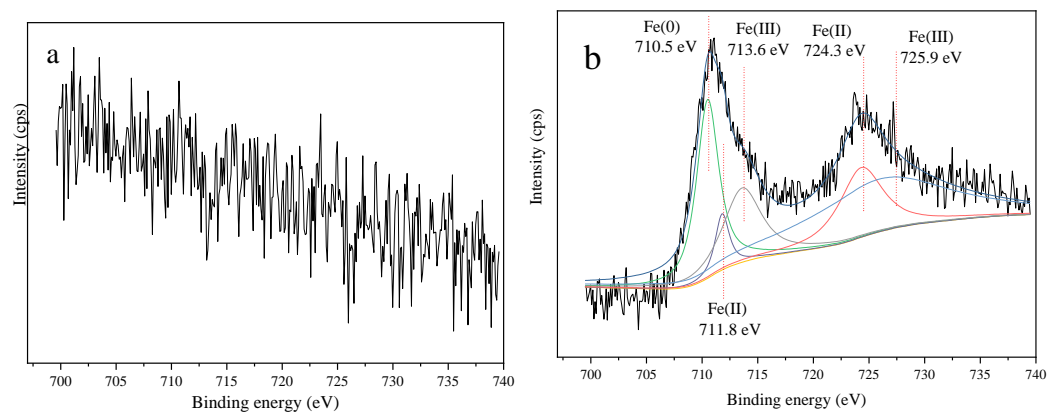

**Figure S3.** XPS characterization of magnified Fe2p spectrogram of Zr-Ce-SBA-15 (a) and nZVI/Zr-Ce-SBA-15 (b).

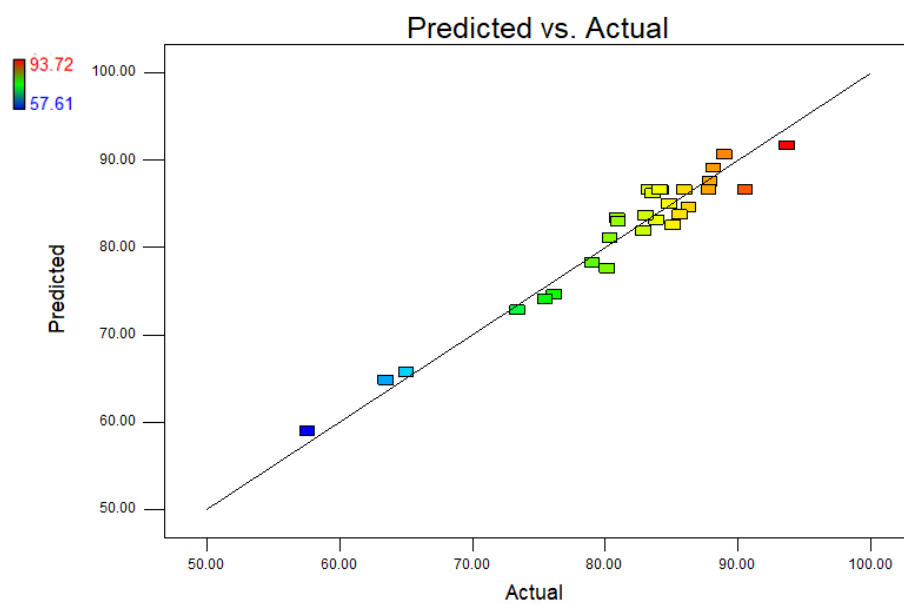

**Figure S4.** Comparison with the predicted and actual values.

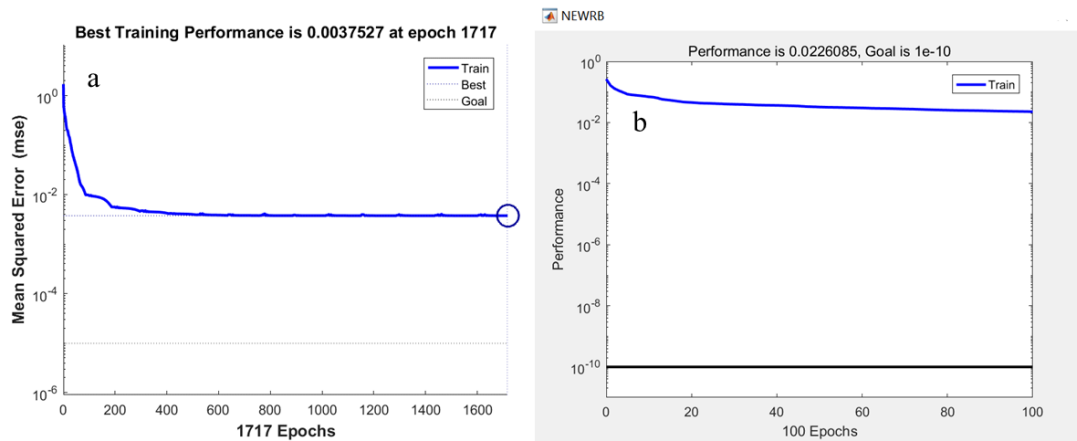

**Figure S5.** The training performance of ANN (a) and RBFNN (b).

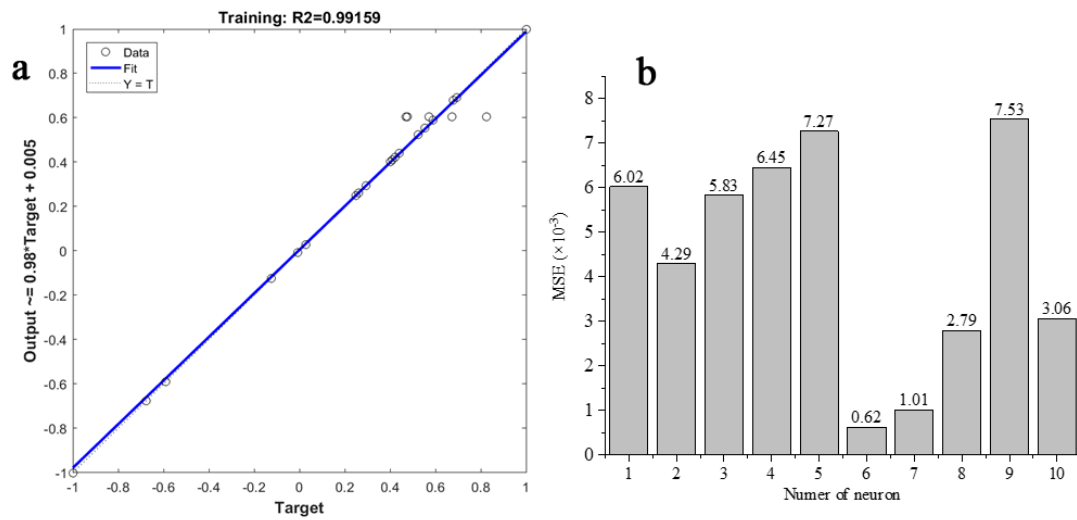

**Figure S6.** The correlation coefficient between target and output values (a) and the lowest MSE value (b) in ANN model.

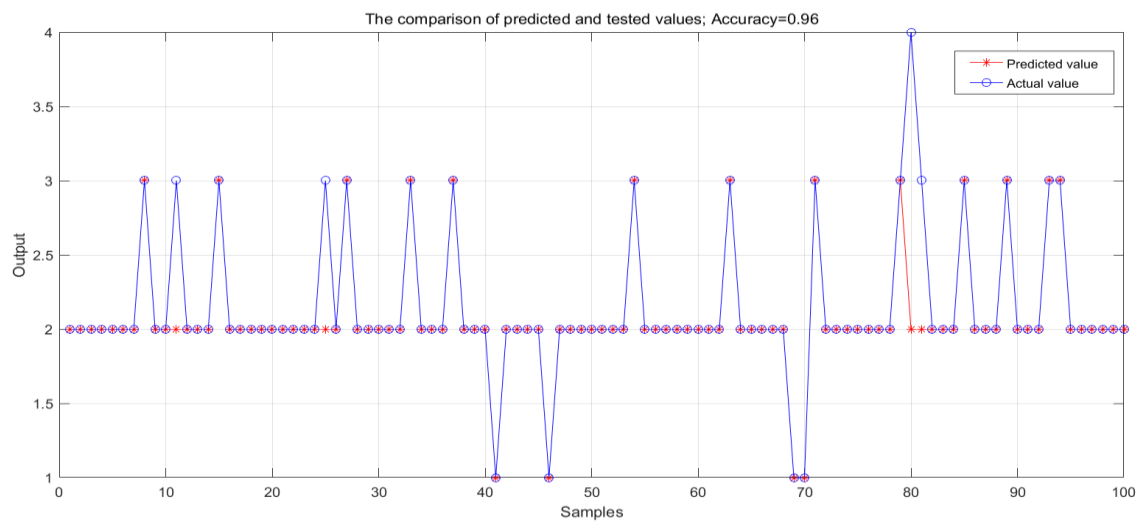

**Figure S7.** The comparison of predicted and actual values by RBFNN.

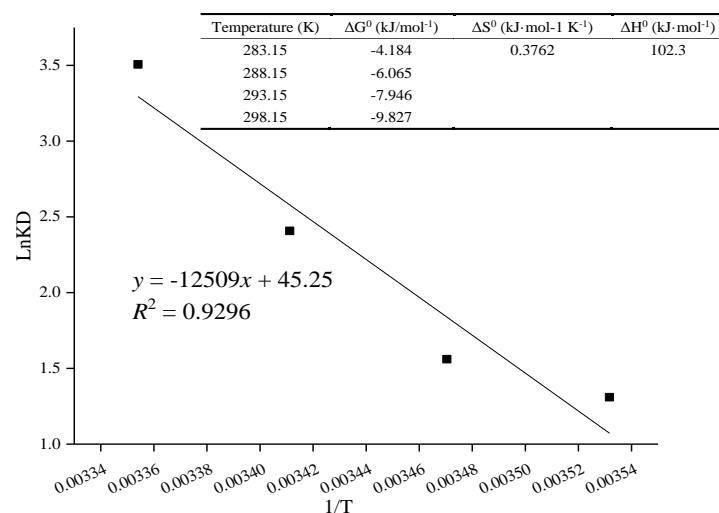

**Figure S8.** The fitting process and parameters of thermodynamics.

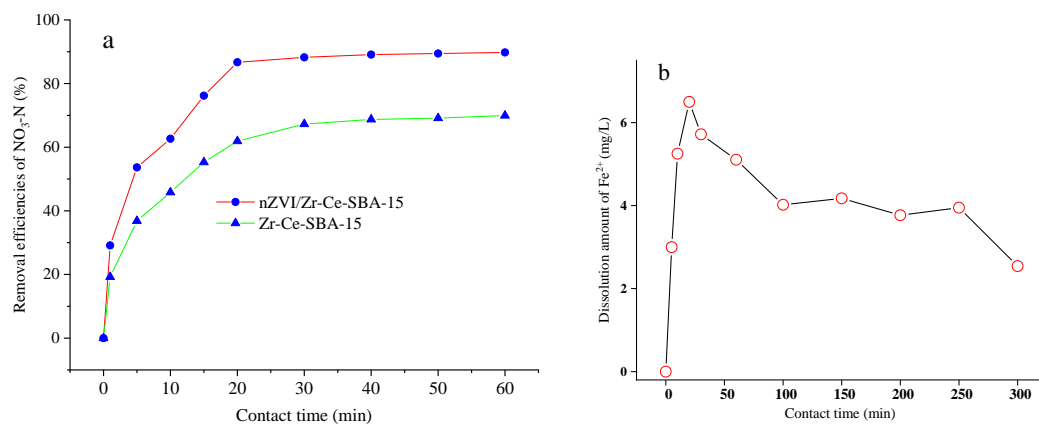

**Figure S9.** The comparison of removal efficiency of  $\text{NO}_3\text{-N}$  using Zr-Ce-SBA-15 and nZVI/Zr-Ce-SBA-15 composites (a) and  $\text{Fe}^{2+}$  dissolution of nZVI/Zr-Ce-SBA-15 in solution (b) (Zr-Ce-SBA-15 or nZVI/Zr-Ce-SBA-15 = 0.15 g; initial  $\text{NO}_3\text{-N}$  concentration = 60 mg/L and initial pH = 4; temperature = 25 °C).

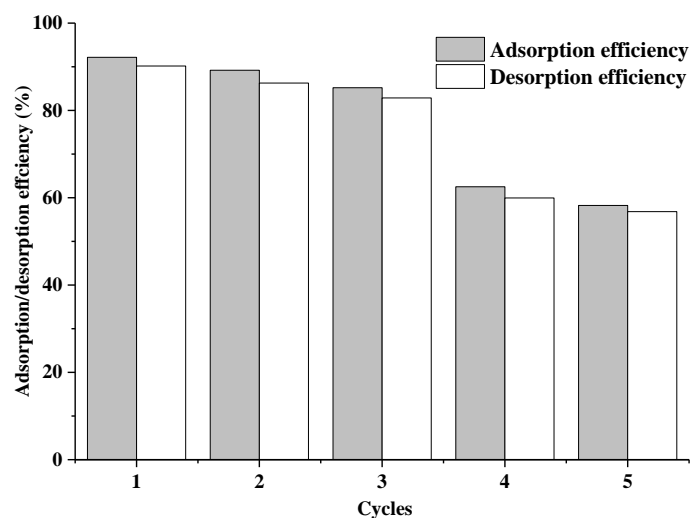

**Figure S10.** The adsorption and desorption efficiencies of nZVI /Ce-Zr-SBA-15.
